# Supplementary material
Source: PubMed Central journal article supplement (PMC6555153)
Supplement: NIHMS1022724-supplement-Supplementary_Tables.pdf [file NIHMS1022724-supplement-Supplementary_Tables.pdf]

Table S2. Primer sequences

|        |                                                 |
|--------|-------------------------------------------------|
| LK     | 5-CGACTGGAGCACGAGGACACTGA-3                     |
| LK-F1  | 5-CGACTGGAGCACGAGGACACTGACTCACCATGTCGCTGAAG-3   |
| LK-R1  | 5-CGACTGGAGCACGAGGACACTGACGAGGACGAGGAGACC-3     |
| LK-F2  | 5-CGACTGGAGCACGAGGACACTGACATGTCGCTGAAGCCCCAGC-3 |
| LK-R3  | 5-CGACTGGAGCACGAGGACACTGAGCGGCGGGCGGCGACGCTAG-3 |
| LK-R6  | 5-CGACTGGAGCACGAGGACACTGACGCTCTTGTTGCCAGGCTG-3  |
| LK-R7  | 5-CGACTGGAGCACGAGGACACTGAGCGGGGTTTCATACCAGATG-3 |
| F1     | 5-CTCACCATGTCGCTGAAG-3                          |
| R1     | 5-CGAGGACGAGGAGACC-3                            |
| F2     | 5-CATGTCGCTGAAGCCCCAGC-3                        |
| R2     | 5-GAGGACGAGGACGGCGAAGG-3                        |
| R3     | 5-GCGGCGGGCGGCGACGCTAG-3                        |
| F4     | 5-GCTGTTGCCATGCCTATTCCAG-3                      |
| R4     | 5-GCAGGAGAGTTCTGCCTCTGAT-3                      |
| R5     | 5-GCTGGGGTGCCGACACCCAC-3                        |
| ACTB-F | 5-AGAGCTACGAGCTGCCTGAC-3                        |
| ACTB-R | 5-AGCACTGTGTTGGCGTACAG-3                        |
